# Supplementary material
Source: Springer Nature journal article supplement (https://www.springermedizin.de/resource/supplementary/12950_2010_178_MOESM8_ESM.pdf/9558134)

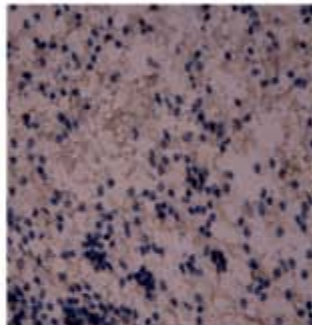

**A**

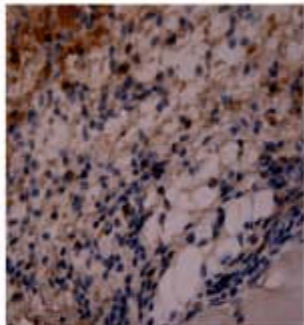

**B**

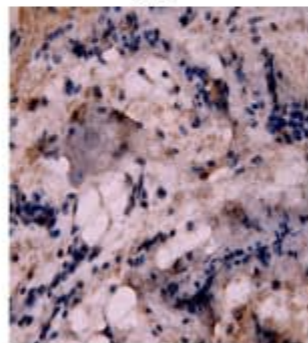

**C**

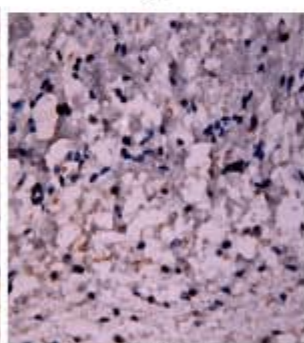

**D**

Supplement: MOESM8 [file 9558134]
